# Supplementary material for: Predicting submicron air pollution indicators: a machine learning approach
Source: Royal Society of Chemistry journal article supplement (doi:10.1039/c3em30890a), 2013-01-01
Supplement: c3em30890a.pdf [file c3em30890a.pdf]

## **Supplementary materials**

### Supplementary material 1

Complete list of classifiers, their corresponding names in WEKA and their parameter settings used to generate predictions for UFP and PM1.0 levels in WEKA.

| Classifier                | WEKA name            | Parameter settings                                                                                                                                                                  | Notes                                                              |
|---------------------------|----------------------|-------------------------------------------------------------------------------------------------------------------------------------------------------------------------------------|--------------------------------------------------------------------|
| Naïve Bayes               | NaiveBayesSimple     | Default                                                                                                                                                                             |                                                                    |
| Bayesian network          | BayesNet             | Default                                                                                                                                                                             |                                                                    |
| SVM                       | SMO                  | Kernel=linear<br>Kernel=polynomial, exponent=2<br>Kernel=polynomial, exponent=3<br>Kernel=polynomial, exponent=5<br>Kernel=polynomial, exponent=8<br>Kernel=polynomial, exponent=10 | Computation becomes prohibitively time consuming                   |
|                           |                      | Kernel=RBF, gamma=0.01<br>Kernel=RBF, gamma=0.1<br>Kernel=RBF, gamma=1<br>Kernel=RBF, gamma=10<br>Kernel=RBF, gamma=50<br>Kernel=RBF, gamma=100                                     |                                                                    |
| Neural Network            | MultilayerPerceptron | Default                                                                                                                                                                             |                                                                    |
| RBF Network               | RBFNetwork           | Default                                                                                                                                                                             |                                                                    |
| K-nearest Neighbour       | IBk                  | k varied, rest assigned to default values                                                                                                                                           | k between 1 and 20 selected using cross-validation on training set |
| RIPPER (Rule-based)       | JRip                 | Default                                                                                                                                                                             |                                                                    |
| Decision Tree             | J48                  | Default                                                                                                                                                                             |                                                                    |
| Alternating Decision Tree | ADTree               | Default                                                                                                                                                                             | Only applicable to binary classification                           |
| Random Forest             | RandomForest         | No. of trees=10<br>No. of trees=30<br>No. of trees=50<br>No. of trees=70<br>No. of trees=100<br>No. of trees=120                                                                    |                                                                    |

## **Supplementary material 2**

Complete evaluation results obtained for the prediction of UFP and PM1.0 levels using all classifiers listed in Appendix 1 (see attached excel spreadsheet). Each table of this excel spreadsheet contains all evaluation measures for binary or ternary classifications of UFP or PM1.0 using class labels generated at the corresponding thresholds.
